# Supplementary material
Source: publisher site journal article supplement (https://www.dovepress.com/article/222126)
Supplement: Supplementary file 1 [file get_supplementary_file.php]

**Supplementary materials**

**Supplementary Table 1.** Patient characteristics of dementia cohort with and without an ethnicity record. Where 5 or fewer cases existed, values are not reported to prevent patient identification.

| **Characteristic** | **Missing Ethnicity number (%)** | **Recorded Ethnicity** | | |
| --- | --- | --- | --- | --- |
| **Ethnicity** | **All** | **White** | **Asian** | **Black** |
| Patients | 26,152 | 26,613 | 614 | 339 |
| **Sex** |  |  |  |  |
| Male | 9344 (35.7%) | 9647 (36.2%) | 276 (45.0%) | 138 (40.7%) |
| **Age (years)** |  |  |  |  |
| Mean (95% CI) | 82.1 (82.0-82.2) | 81.4 (81.3-81.5) | 78.4 (77.7-79.1) | 76.6 (75.5-77.6) |
| **Age category** |  |  |  |  |
| 50–59 | 476 (1.8%) | 812 (3.1%) | 27 (4.4%) | 31 (9.1%) |
| 60–69 | 1834 (7.0%) | 2169 (8.2%) | 73 (11.9%) | 42 (12.4%) |
| 70–79 | 6938 (26.5%) | 7049 (26.5%) | 226 (36.8%) | 131 (38.6%) |
| 80–89 | 12,471 (47.7%) | 12,394 (46.6%) | 236 (38.4%) | 115 (33.9%) |
| 90+ | 4433 (17.0%) | 4189 (15.7%) | 52 (8.5%) | 20 (5.9%) |
| **Calendar year** |  |  |  |  |
| 2014 | 20216 (77.3%) | 19717 (74.1%) | 428 (69.7%) | 259 (76.4%) |
| 2015 | 20950 (80.1%) | 21806 (81.9%) | 506 (82.4%) | 269 (79.4%) |
| 2016 | 15930 (60.9%) | 16465 (61.9%) | 391 (63.7%) | 203 (59.9%) |
| **Townsend quintile** |  |  |  |  |
| 1 (least deprived) | 5809 (23.1%) | 5483 (21.5%) | 93 (15.8%) | 37 (11.3%) |
| 2 | 6336 (25.2%) | 5867 (23.0%) | 117 (19.8%) | 40 (12.2%) |
| 3 | 5399 (21.5%) | 5559 (21.8%) | 129 (21.9%) | 68 (20.7%) |
| 4 | 4649 (18.5%) | 5032 (19.8%) | 165 (28.0%) | 88 (26.8%) |
| 5 (most deprived) | 2929 (11.7%) | 3535 (13.9%) | 86 (14.6%) | 95 (29.0%) |
| **Follow-up Time (years)** |  |  |  |  |
| Mean (95% CI) | 1.72 (1.71-1.73) | 1.70 (1.69-1.71) | 1.66 (1.59-1.72) | 1.71 (1.62-1.80) |
| **Prescribing Index** | 8.66 (8.63-8.69) | 8.46 (8.43-8.49) | 8.88 (8.69-9.08) | 8.05 (7.76-8.34) |
| **Diagnosis** |  |  |  |  |
| Alzheimer's Disease | 5101 (19.5%) | 5085 (19.1%) | 107 (17.4%) | 70 (20.6%) |
| Mixed Dementia | 262 (1.0%) | 281 (1.1%) | 7 (1.1%) | n/a |
| Vascular Dementia | 4517 (17.3%) | 5007 (18.8%) | 150 (24.4%) | 57 (16.8%) |
| Parkinson's / Lewy Body Disease | 362 (1.4%) | 351 (1.3%) | 9 (1.5%) | n/a |
| Alcohol-related Dementia | 122 (0.5%) | 149 (0.6%) | n/a | n/a |
| Other Specified Dementia | 222 (0.8%) | 322 (1.2%) | n/a | n/a |
| Frontotemporal Dementia | 11 (<0.1%) | n/a | n/a | n/a |
| Unspecified Dementia | 15,566 (59.5%) | 15,418 (57.9%) | 333 (54.2%) | 203 (59.9%) |

**Supplementary Table 2.** Participant characteristics of non-dementia cohort, total and by each ethnicity. As ethnicity and Townsend score of social deprivation were imputed and sample sizes should not be reported for imputed data, only percentages are reported for characteristics of each ethnicity and for Townsend score.

| **Characteristic** | **Number (%)** | **%** | **%** | **%** |
| --- | --- | --- | --- | --- |
| **Ethnicity** | **All** | **White** | **Asian** | **Black** |
| Patients | 1,648,889 | 95.1% | 3.3% | 1.6% |
| **Sex** |  |  |  |  |
| Male | 793,168 (48.1%) | 48.1% | 49.3% | 48.3% |
| **Age (years)** |  |  |  |  |
| Mean (95% CI) | 63.8 (63.8-63.8) | 64.0 (64.0-64.0) | 61.3 (61.2-61.4) | 59.4 (59.3-59.6) |
| **Age category** |  |  |  |  |
| 50–59 | 714,707 (43.3%) | 42.6% | 53.6% | 65.6% |
| 60–69 | 477,500 (29.0%) | 29.2% | 26.7% | 16.9% |
| 70–79 | 296,536 (18.0%) | 18.2% | 14.1% | 13.3% |
| 80–89 | 135,294 (8.2%) | 8.4% | 4.8% | 3.8% |
| 90+ | 24,852 (1.5%) | 1.6% | 0.6% | 0.4% |
| **Calendar year** |  |  |  |  |
| 2014 | 1,514,081 (91.8%) | 92.0% | 89.0% | 85.8% |
| 2015 | 1,456,897 (88.4%) | 88.6% | 83.3% | 82.5% |
| 2016 | 1,176,153 (71.3%) | 71.6% | 66.3% | 68.4% |
| **Townsend quintile** |  |  |  |  |
| 1 (least deprived) | 27.2% | 27.8% | 20.7% | 9.8% |
| 2 | 24.1% | 24.6% | 18.2% | 11.3% |
| 3 | 21.2% | 21.1% | 23.8% | 21.9% |
| 4 | 16.8% | 16.4% | 22.6% | 28.6% |
| 5 (most deprived) | 10.7% | 10.3% | 14.8% | 28.5% |
| **Follow-up Time (years)** |  |  |  |  |
| Mean (95% CI) | 2.25 (2.25-2.25) | 2.26 (2.26-2.26) | 2.07 (2.06-2.08) | 2.06 (2.04-2.08) |
| **Prescribing Index** | 7.26 (7.26-7.27) | 7.27 (7.26-7.27) | 7.43 (7.39-7.46) | 6.62 (6.56-6.68) |

**Supplementary Table 3**. Complete case results for the prevalence rate ratio and 95% confidence interval (CI) for each of the four prescribing outcomes in the dementia cohort (n=26,394). Results are shown for unadjusted models and models adjusted for sex, age category, and Townsend score.

|  | **Anti-dementia drugs, not contraindicated (n=21,287)** | | **Anticholinergics** | | **Antipsychotics** | | **Anxiolytics / Hypnotics** | |
| --- | --- | --- | --- | --- | --- | --- | --- | --- |
|  | **Unadjusted** | **Adjusted** | **Unadjusted** | **Adjusted** | **Unadjusted** | **Adjusted** | **Unadjusted** | **Adjusted** |
| **Ethnicity (reference is White)** |  |  |  |  |  |  |  |  |
| Asian | 0.89 (0.76-1.04) | **0.84 (0.71-0.99)** | **1.51 (1.24-1.83)** | **1.48 (1.22-1.8)** | 0.92 (0.75-1.12) | 0.91 (0.74-1.11) | 1.05 (0.88-1.24) | 1.03 (0.86-1.22) |
| Black | 0.92 (0.76-1.13) | 0.9 (0.73-1.1) | 0.92 (0.67-1.27) | 0.85 (0.61-1.19) | 1.04 (0.79-1.36) | 1.08 (0.82-1.41) | **0.61 (0.45-0.81)** | **0.61 (0.45-0.82)** |
| **Sex** |  |  |  |  |  |  |  |  |
| Female |  | 0.96 (0.93-1.01) |  | 1.07 (0.99-1.15) |  | 1 (0.95-1.06) |  | 0.98 (0.93-1.03) |
| **Age** |  |  |  |  |  |  |  |  |
| 50-59 |  | **0.61 (0.53-0.71)** |  | 0.88 (0.71-1.08) |  | 0.9 (0.75-1.07) |  | 0.93 (0.8-1.09) |
| 60-69 |  | **0.76 (0.71-0.83)** |  | 1.04 (0.92-1.18) |  | 0.95 (0.86-1.06) |  | 1.04 (0.95-1.14) |
| 70-79 |  | 1 |  | 1 |  | 1 |  | 1 |
| 80-89 |  | **0.95 (0.91-0.99)** |  | **0.88 (0.82-0.96)** |  | 1.02 (0.95-1.09) |  | 1 (0.94-1.06) |
| 90-105 |  | **0.64 (0.59-0.69)** |  | **0.7 (0.62-0.79)** |  | **1.16 (1.07-1.27)** |  | **1.09 (1.01-1.17)** |
| **Townsend** |  |  |  |  |  |  |  |  |
| 1 |  | 1 |  | 1 |  | 1 |  | 1 |
| 2 |  | 0.94 (0.89-1) |  | 0.96 (0.87-1.07) |  | 1.01 (0.92-1.1) |  | 0.95 (0.88-1.03) |
| 3 |  | **0.92 (0.87-0.98)** |  | 0.98 (0.88-1.09) |  | 1 (0.92-1.09) |  | 0.97 (0.9-1.05) |
| 4 |  | **0.92 (0.86-0.98)** |  | 1.06 (0.95-1.19) |  | 0.93 (0.85-1.02) |  | 0.98 (0.91-1.06) |
| 5 |  | **0.9 (0.83-0.97)** |  | 1.02 (0.9-1.15) |  | 0.93 (0.84-1.03) |  | 0.92 (0.84-1.01) |

*Statistically significant results are in bold**.**

**Supplementary Table 4**. Complete case results for the prevalence rate ratio and 95% confidence interval (CI) for the prescribing outcomes in the non-dementia cohort: drugs with a definite anticholinergic burden, antipsychotics, and anxiolytics and hypnotics (n=882,993). Results are shown for unadjusted models and models adjusted for sex, age category, and Townsend score.

|  | **Anticholinergics** | | **Antipsychotics** | | **Anxiolytics / Hypnotics** | |
| --- | --- | --- | --- | --- | --- | --- |
|  | **Unadjusted** | **Adjusted** | **Unadjusted** | **Adjusted** | **Unadjusted** | **Adjusted** |
| **Ethnicity (reference is White)** |  |  |  |  |  |  |
| Asian | **0.9 (0.86-0.93)** | **0.93 (0.87-0.98)** | **0.82 (0.75-0.89)** | **0.76 (0.67-0.86)** | **0.79 (0.76-0.83)** | **0.8 (0.75-0.85)** |
| Black | **0.74 (0.69-0.79)** | **0.77 (0.7-0.84)** | 0.91 (0.8-1.03) | 0.95 (0.81-1.12) | **0.67 (0.62-0.72)** | **0.68 (0.61-0.75)** |
| **Sex** |  |  |  |  |  |  |
| Female |  | **1.68 (1.64-1.71)** |  | **1.12 (1.08-1.16)** |  | **1.46 (1.44-1.49)** |
| **Age** |  |  |  |  |  |  |
| 50-59 |  | **0.67 (0.65-0.69)** |  | **0.74 (0.7-0.79)** |  | **0.85 (0.83-0.87)** |
| 60-69 |  | **0.81 (0.79-0.83)** |  | **0.66 (0.62-0.7)** |  | **0.83 (0.81-0.85)** |
| 70-79 |  | 1 |  | 1 |  | 1 |
| 80-89 |  | **1.13 (1.09-1.16)** |  | **2.18 (2.05-2.32)** |  | **1.23 (1.19-1.28)** |
| 90-105 |  | **1.19 (1.12-1.27)** |  | **4.25 (3.91-4.62)** |  | **1.66 (1.57-1.76)** |
| **Townsend** |  |  |  |  |  |  |
| 1 |  | 1 |  | 1 |  | 1 |
| 2 |  | **1.07 (1.03-1.1)** |  | **1.06 (0.99-1.13)** |  | **1.03 (1-1.06)** |
| 3 |  | **1.21 (1.18-1.25)** |  | **1.44 (1.35-1.53)** |  | **1.14 (1.11-1.18)** |
| 4 |  | **1.41 (1.37-1.45)** |  | **1.63 (1.53-1.74)** |  | **1.24 (1.2-1.28)** |
| 5 |  | **1.66 (1.61-1.72)** |  | **2.17 (2.02-2.32)** |  | **1.47 (1.41-1.52)** |

*Statistically significant results are in bold.
